# Supplementary material
Source: PubMed Central journal article supplement (PMC8447421)
Supplement: JGS-69-3397-s001.pdf [file JGS-69-3397-s001.pdf]

**Table S1.** ICD-10 COVID-19 code presence among SARS-CoV-2-positive skilled nursing facility residents (n=17,194), by symptom status

|                                                | <b>Asymptomatic<br/>SARS-CoV-2 infection</b> | <b>Symptomatic<br/>SARS-CoV-2 infection</b> | <b>Total</b>  |
|------------------------------------------------|----------------------------------------------|---------------------------------------------|---------------|
| <b>Total</b>                                   | 9,745                                        | 7,449                                       | 17,194        |
| U07.1 (COVID-19, virus identified)             | 8,885 (91.2)                                 | 7,064 (94.8)                                | 15,949 (92.8) |
| Z86.16 (Personal history of COVID-19)*         | 3,434 (35.2)                                 | 2,269 (30.5)                                | 5,703 (33.2)  |
| J12.82 (Pneumonia due to coronavirus disease)* | 99 (1.0)                                     | 57 (0.8)                                    | 156 (0.9)     |
| U07.1 or Z86.16 or J12.82                      | 8,950 (91.8)                                 | 7,075 (95.0)                                | 16,025 (93.2) |

\*Became operational January 1, 2021

Residents were considered symptomatic if they had any of the following symptoms from 5 days before up to 14 days after their initial positive test: cough, hypoxia, fever, chills, dyspnea, tachycardia, nausea, vomiting, diarrhea, chest congestion, altered mental status, rhinorrhea, nasal congestion, sore throat, malaise, taste changes, headache, loss of appetite, respiratory arrest, and respiratory infection

**Table S2.** Prevalence of ICD-10 COVID-19 codes for skilled nursing facility residents with lab-confirmed SARS-CoV-2-infection (n=17,194), by quarter

|                               | <b>U07.1 diagnosis code<br/>PRESENT</b> | <b>Total</b> |
|-------------------------------|-----------------------------------------|--------------|
| <b>Total</b>                  | 15,949 (92.8)                           | 17,194       |
| March - May 2020              | 6,702 (97.5)                            | 6,874        |
| June - August 2020            | 2,015 (97.4)                            | 2,068        |
| September - November 2020     | 2,580 (88.3)                            | 2,921        |
| December 2020 - February 2021 | 4,514 (88.4)                            | 5,105        |
| March - May 2021              | 138 (61.1)                              | 226          |
